# Supplementary material
Source: MDPI journal article supplement (https://www.mdpi.com/1424-8220/14/3/4312)
Supplement: s1 [file s1]

# Supporting Information

## The Survey Form for AAL Platform/Systems Usage

### Real-world Usage of Ambient Assisted Living Platforms/Systems

(Please fill this form and email to: Mukhtiar Memon (mume@iha.dk), Stefan Wagner (sw@iha.dk)).

#### Part A: Project/Program/System Profile:

*This part provides a brief introduction of the ambient-assisted living platform/system/solution.*

**Name of the System/ Platform/ Project:** \_\_\_\_\_

**Duration:** \_\_\_\_\_

**Funded-by:** \_\_\_\_\_

**Contact Person:** \_\_\_\_\_

**Email:** \_\_\_\_\_

**Telephone:** \_\_\_\_\_

**Any other information about the project:** \_\_\_\_\_

\_\_\_\_\_

Should we publish the name of your project/solution in our findings/analysis?

☐ YES ☐ NO (Keep in Confidential)

#### Part B: Platform/System Usage Information:

*This part provides the usage information of AAL system/platform/solution.*

**Number of Systems** deployed: \_\_\_\_\_

**Number of End-users** using system: \_\_\_\_\_

**Number of Staff-users** using system: \_\_\_\_\_

**Homes** deployed: \_\_\_\_\_

**Medical Devices** Supported: \_\_\_\_\_

**Standards** Supported: \_\_\_\_\_

**Operating System** supported: \_\_\_\_\_

**Programming Languages** Supported: \_\_\_\_\_

**Service Model** used: \_\_\_\_\_

**Cost** per System/User: \_\_\_\_\_

**Any other information about usage of the system:** \_\_\_\_\_

\_\_\_\_\_
